# Supplementary material for: Fused pentacyclic electron acceptors with four cis-arranged alkyl side chains for efficient polymer solar cells
Source: Royal Society of Chemistry journal article supplement (doi:10.1039/c7ta10026d), 2018-01-01
Supplement: c7ta10026d1.pdf [file c7ta10026d1.pdf]

## Supporting Information

### Fused Pentacyclic Electron Acceptors with *cis*-Arranged Alkyl Side Chains for Efficient Polymer Solar Cells

Ran Hou,<sup>†</sup> Miao Li,<sup>†</sup> Shiyu Feng, Yahui Liu, Liangliang Wu, Zhaozhao Bi, Xinjun Xu,<sup>\*</sup> Wei Ma<sup>\*</sup>,  
Zhishan Bo<sup>\*</sup>

R. Hou, M. Li, Y. Liu, Z. Zhang, L. Wu, Dr. X. Xu, Prof. Z. Bo

Key Laboratory of Energy Conversion and Storage Materials, College of Chemistry, Beijing Normal University,  
Beijing 100875, P.R. China

\*E-mail: xuxj@bnu.edu.cn; zsbo@bnu.edu.cn

Z. Z. Bi, Prof. W. Ma

State Key Laboratory for Mechanical Behavior of Materials, Xi'an Jiaotong University, Xi'an 710049, China

\*E-mail: msewma@mail.xjtu.edu.cn

#### 1. Experimental section:

##### *Materials and synthesis*

The material **1** was synthesized as pervious literature<sup>1</sup>. The other materials were common commercial level and used without further purification

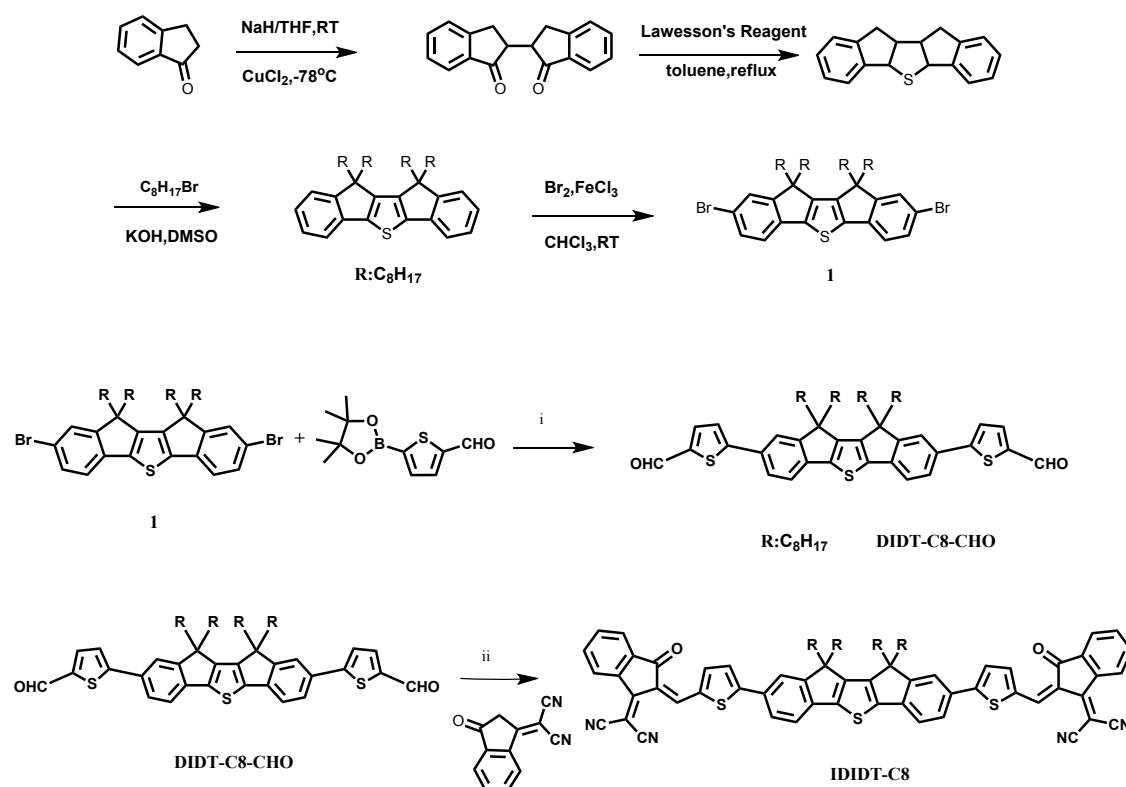

**Scheme S1.** Synthetic route to **IDIDT-C8**. Reagents and conditions: i) Pd<sub>2</sub>(dba)<sub>3</sub>, P-(*o*-tol)<sub>3</sub>, NaHCO<sub>3</sub>, THF/H<sub>2</sub>O, reflux; ii) pyridine, CHCl<sub>3</sub>, reflux.

### Synthesis of **DIDT-C8-CHO**

A mixture of material 1 (600 mg, 0.69 mmol), 2-(5-bromo-2-thienyl)-4,4,5,5-tetramethyl-1,3,2-dioxaborolane (280 mg, 1.73 mmol) and NaHCO<sub>3</sub> in THF/H<sub>2</sub>O (30 mL/1 mL) was degassed before and after Pd<sub>2</sub>(dba)<sub>3</sub> (19 mg, 0.02 mmol), P-(*o*-tol)<sub>3</sub> (12.6 mg, 0.04 mmol) were added. The mixture was refluxed for 3 days under N<sub>2</sub>. After cooling to room temperature, the mixture was extracted with DCM and then the combined organic layer dried over anhydrous MgSO<sub>4</sub>. After the solvent was removed under reduced pressure, the crude product was purified by column chromatography (silica gel; eluent: petroleum ether:DCM = 1:5) to afford **DIDT-C8-CHO** as an orange-yellow solid. Yield (350 mg, 55%). <sup>1</sup>H NMR (400 MHz, CDCl<sub>3</sub>) δ: 9.90 (s, 2H), 7.76 (d, 2H), 7.63 (d, 2H), 7.51 (s, 2H), 7.46 (d, 2H), 7.41 (d, 2H), 2.11 (t, 8H), 1.17-0.60 (m, 60H). <sup>13</sup>C NMR (100 MHz, CDCl<sub>3</sub>) δ: 182.65, 155.21, 153.54, 150.36, 145.210, 141.78, 140.35, 137.55, 129.98, 125.68, 123.53, 119.68, 118.67, 55.74, 40.21, 31.82, 30.19, 29.60, 29.43, 24.18, 22.61, 14.03. Anal. calcd for C<sub>60</sub>H<sub>80</sub>O<sub>2</sub>S<sub>3</sub>(%): C, 77.53; H, 8.68; found: C, 76.88; H, 8.78.

### Synthesis of **IDIDT-C8**

A mixture of **DIDT-C8-CHO** (350 mg, 0.38 mmol) and INCN (738 mg, 3.8 mmol) in chloroform was carefully degassed before and after pyridine was added. After refluxed under N<sub>2</sub> overnight, the reaction was cooled to room temperature. The solvent was evaporated out, and the residue was purified on silica gel column with DCM/petroleum ether (1:1, v/v) to give **IDIDT-C8** as a dark blue solid in a yield of 65% (314mg). <sup>1</sup>H NMR (400 MHz, CDCl<sub>3</sub>) δ: 8.75 (s, 2H), 8.73 (d, 2H), 7.99 (d, 2H), 7.98 (d, 2H), 7.92-

7.68 (m, 6H), 7.61 (s, 2H) 7.60 (s, 2H), 7.45 (d, 2H), 2.20 (t, 8H), 1.19-0.71 (m, 60H).

$^{13}\text{C}$  NMR (100 MHz,  $\text{CDCl}_3$ )  $\delta$ : 188.50, 161.57, 160.53, 153.79, 150.96, 146.59, 145.96, 141.16, 140.07, 138.02, 136.93, 135.23, 134.56, 130.17, 126.34, 125.38, 124.67, 123.76, 122.16, 119.76, 118.94, 114.62, 114.56, 55.60, 40.24, 31.84, 30.22, 29.70, 29.46, 24.29, 22.62, 14.04. Anal. Calcd for  $\text{C}_{84}\text{H}_{88}\text{N}_4\text{S}_3$ : C 78.71, H 6.92, N 4.37. Found: C 78.30, H 7.09, N 4.32.

### ***Measurements and Instruments.***

$^1\text{H}$  and  $^{13}\text{C}$  NMR spectra were recorded on a Bruker AV 400 spectrometer. UV-visible absorption spectra were obtained on a PerkinElmer UV-vis spectrometer model Lambda 750. Elemental analyses were performed on a Flash EA 1112 analyzer. Thermal gravimetric analysis (TGA) and differential scanning calorimetry (DSC) measurements were performed on TA2100 and Perkin-Elmer Diamond DSC instrument, respectively, under a nitrogen atmosphere at a heating rate of 10  $^\circ\text{C}/\text{min}$  to record TGA and DSC curves. Atomic force microscopy (AFM) measurements were performed under ambient conditions using a Digital Instrument Multimode Nanoscope IIIA operating in the tapping mode. Transmission electron microscopy (TEM) images were obtained with a FEI Technai TF20 (Philip) transmission electron microscopy. The thickness of the blend films was determined by a Dektak 6 M surface profilometer. The powder X-ray diffraction (XRD) patterns were collected using a PANalytical X'Pert PRO MPD diffractometer with  $\text{Cu K}\alpha$  radiation. The electrochemical behavior of the molecules was investigated using cyclic voltammetry (CHI 630A Electrochemical Analyzer) with a standard three-electrode electrochemical cell in a 0.1 M  $\text{Bu}_4\text{NPF}_6$

solution in CH<sub>3</sub>CN at room temperature under an atmosphere of nitrogen with a scanning rate of 0.1 V/s. A Pt plate working electrode, a Pt wire counter electrode, and an Ag/AgNO<sub>3</sub> (0.01 M in CH<sub>3</sub>CN) reference electrode were used. The experiments were calibrated with the standard ferrocene/ferrocenium (Fc) redox system and assumption that the energy level of Fc is 4.8 eV below vacuum.

### ***Solar Cells Fabrication and Characterization***

PSCs were fabricated with the device configuration of ITO/ZnO (30 nm)/active layer (100 nm)/MoO<sub>3</sub> (85 Å)/Ag (100 nm). The sheet resistance of ITO is 15 Ω per square. The ITO-coated glass substrates were sequentially cleaned by deionized water, acetone, and isopropanol and then the substrates were dried at 150 °C for 15 minutes. The ZnO precursor was prepared as the pervious literature reported.<sup>2</sup> The ZnO precursor solution was spin-coated on top of a cleaned ITO substrate at 3500 rpm for 40 s and annealed subsequently at 200 °C for 20 min on a hotplate before being transferred into a glove box. A mixture of PBDB-T and **IDIDT-C8** was dissolved in DCB (with or without DIO) with the polymer concentration of 4 mg mL<sup>-1</sup>. The solution was heated at 110 °C for at least two hours to ensure sufficient dissolution and then the solution was spin-coated at 1200 rpm for 40 s onto the ZnO layer to form the active layer. Finally, 8.5 nm-thick MoO<sub>3</sub> film and 100 nm thick Ag layer were deposited sequentially to complete the fabrication of devices. On one substrate, five cells with an effective area of 0.04 cm<sup>2</sup> for each were fabricated. Current-voltage characteristics were recorded using an Enli Technology Ltd., Taiwan (SS-F53A) under an AM 1.5G AAA class solar simulator with an intensity of 100 mW cm<sup>-2</sup> as the white light source and the intensity was

calibrated with a standard single crystal Si photovoltaic cell. The temperature while measuring the  $J$ - $V$  curves was approximately 25 °C. The EQE measurements of PSCs were performed by the solar cell spectral response measurement system QE-R3011 (Enli Technology Ltd., Taiwan), which was calibrated by monocrystalline silicon solar cell in advance.

### ***Space-Charge Limited Current Measurement***

Hole/electron devices with a structure of ITO/PEDOT:PSS (30 nm)/active layer/Au and FTO/active layer/Al were fabricated. A solution of PBDB-T and **ID1T-C8** in 1,2-dichlorobenzene (DCB) was spin-coated onto PEDOT:PSS or FTO to form active layer like PSC devices, and Au (Al) was thermally evaporated at a pressure of  $10^{-4}$  Pa through a shadow mask. Dark  $J$ - $V$  curves of the hole/electron devices were measured by the space-charge limited current (SCLC) method. Hole and electron mobilities of devices were measured by space charge limited current (SCLC) model and calculated according to equations reported in previous literature.<sup>3-5</sup> Dark  $J$ - $V$  curves were fitted by using the Mott-Gurney equation:  $J = 9\varepsilon_0\varepsilon_r\mu V^2/8d^3$ , where  $J$  is the space charge limited current,  $\varepsilon_0$  is the vacuum permittivity ( $\varepsilon_0=8.85\times 10^{-12}$  F/m),  $\varepsilon_r$  is the permittivity of the active layer ( $\varepsilon_r=3$ ),  $\mu$  is mobility, and  $d$  is the thickness of the active layer.

### ***Grazing Incidence Wide-Angle X-ray Scattering (GIWAXS) Characterization***

GIWAXS measurements were performed at beamline 7.3.3<sup>6</sup> at the Advanced Light Source. Samples were prepared on Si substrates using identical blend solutions as those used in devices. The 10 keV X-ray beam was incident at a grazing angle of 0.12°-0.16°, selected to maximize the scattering intensity from the samples. The scattered x-rays were detected using a Dectris Pilatus 2M photon counting detector.

## 2. Scheme and Figures

**Table S1.** Photovoltaic performance of devices fabricated with **PBDB-T** and **IDIDT-C8**.

| <b>D:A (w/w)</b> | $V_{oc}$ (V) | $J_{sc}$<br>(mA/cm <sup>2</sup> ) | <b>FF (%)</b> | <b>PCE (%)</b> |
|------------------|--------------|-----------------------------------|---------------|----------------|
| 1:0.8            | 0.87         | 12.63                             | 54.28         | 5.99           |
| 1:1              | 0.88         | 13.55                             | 53.26         | 6.43           |
| 1:1.5            | 0.92         | 14.65                             | 56.56         | 7.65           |
| 1:2              | 0.93         | 12.33                             | 50.05         | 5.95           |

**Table S2.** Photovoltaic performance of devices fabricated with **PBDB-T** and **IDIDT-C8** with DIO.

| <b>D:A</b> | <b>Additive</b> | $V_{oc}(V)$ | $J_{sc}(mA/cm^2)$ | <b>FF(%)</b> | <b>PCE(%)</b> |
|------------|-----------------|-------------|-------------------|--------------|---------------|
| 1:1.5      | 0.3%DIO         | 0.90        | 13.72             | 55.19        | 6.82          |
| 1:1.5      | 0.5%DIO         | 0.91        | 15.62             | 58.10        | 8.23          |
| 1:1.5      | 0.7%DIO         | 0.97        | 15.81             | 65.88        | 10.10         |
| 1:1.5      | 0.8%DIO         | 0.94        | 15.43             | 59.87        | 8.68          |
| 1:1.5      | 0.9%DIO         | 0.94        | 15.23             | 58.32        | 8.33          |
| 1:1.5      | 1.0%DIO         | 0.95        | 14.61             | 53.93        | 7.46          |

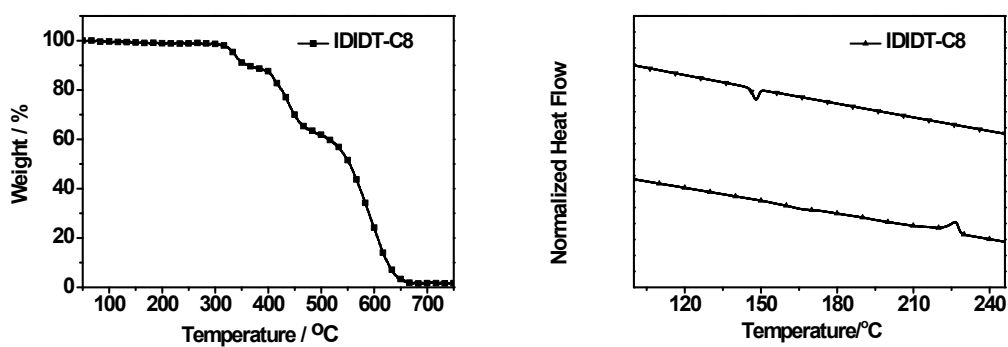

Figure S1. TGA (a) and DSC (b) curves of **IDDT-C8**.

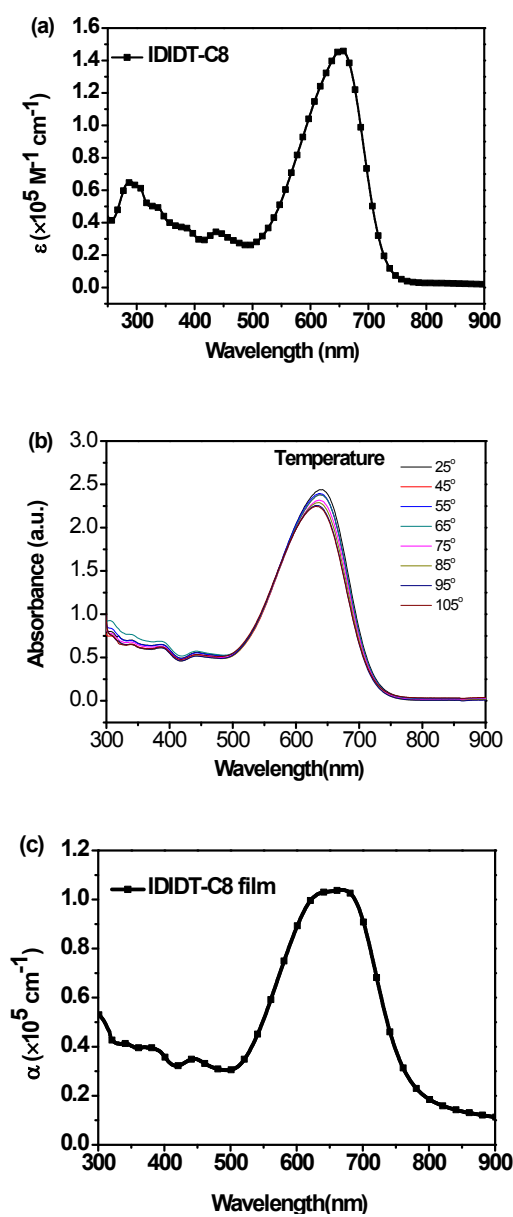

Figure S2. (a) UV-vis curves of **IDDT-C8** in chloroform solution (10<sup>-5</sup> M); (b) UV-

Vis absorption spectra of the **IDIDT-C8** solution ( $0.02 \text{ mg mL}^{-1}$  in DCB) at indicated temperatures. (c) Absorption coefficient  $\alpha$  of **IDIDT-C8** measured in the neat film spin-coated from chloroform.

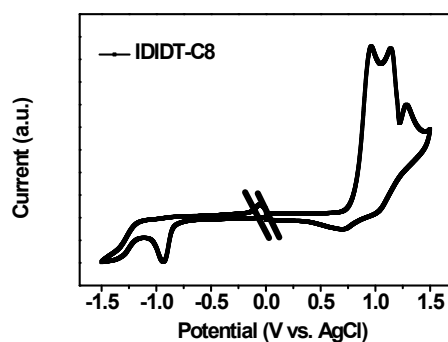

**Figure S3.** Cyclic voltammograms of **IDIDT-C8** as films on a Pt electrode measured in  $0.1 \text{ M Bu}_4\text{NPF}_6$  acetonitrile solutions at a scan rate of  $100 \text{ mV/s}$ .

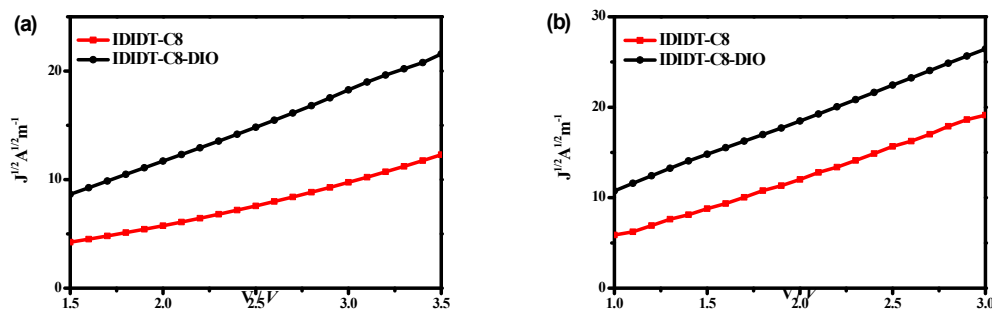

**Figure S4.** a) The hole mobility and b) electron mobility of blend film based on **IDIDT-C8**.



## References

1. C. H. Chen, Y. J. Cheng, M. Dubosc, C. H. Hsieh, C. C. Chu, C. S. Hsu, *Chemistry-An Asian Journal*, 2010, **5**, 2483-2492.
2. Y. M. Sun, J. H. Seo, C. J. Takacs, J. Seifter, A. J. Heeger, *Adv. Mater.* 2011, **23**, 1679-1683.
3. C. Goh, R. J. Kline, M. D. McGehee, E. N. Kadnikova and J. M. J. Frechet, *Appl. Phys. Lett.*, 2005, **86**, 122110-122113.
4. K. Markus, E. Hans-Joachim, D. Gilles, M. C. Scharber, C. J. Brabec, S. Pavel and C. N. Hoth, *Adv. Funct. Mater.*, 2010, **20**, 338-346.
5. C. Goh, R. J. Kline, M. D. McGehee, E. N. Kadnikova and J. M. J. Frechet, *Appl. Phys. Lett.*, 2005, **86**, 122110-122113.
6. H. Alexander, B. Wim, G. James, S. Eric, G. Eliot, K. Rick, M. Alastair, C. Matthew, R. Bruce and P. Howard, *Journal of Physics: Conference Series*, 2010, 247, 012007.
